# Supplementary material for: Catalytic phosphorylation using a bifunctional imidazole derived nucleophilic catalyst
Source: Royal Society of Chemistry journal article supplement (doi:10.1039/b506344b), 2005-01-01
Supplement: b506344b.pdf [file b506344b.pdf]

## Catalytic phosphorylation using a bifunctional imidazole derived nucleophilic catalyst

Simon Jones, Julian Northern and Alan Rolfe

### Supplementary Information – Contents

|                                                                                                                                         |    |
|-----------------------------------------------------------------------------------------------------------------------------------------|----|
| General Experimental                                                                                                                    | A1 |
| (1-Methylimidazol-2-yl) methanol <b>3</b>                                                                                               | A1 |
| 2-[2-(2-Methoxy-ethoxy)-ethoxymethyl]-1-methyl-1H-imidazole <b>1</b>                                                                    | A2 |
| General procedure for the kinetic evaluation of the catalyst for the phosphorylation of cyclohexanol in CH <sub>2</sub> Cl <sub>2</sub> | A2 |
| Data from kinetic plots (Figure 2)                                                                                                      | A3 |
| 2-Heptyloxymethyl-1-methyl-1 <i>H</i> -imidazole <b>4</b>                                                                               | A3 |
| General procedure for the preparation of catalysts <b>7</b> and <b>8</b>                                                                | A4 |
| 2-{2-[2-(2-Methoxy-ethoxy)-ethoxy]-ethoxymethyl}-1-methyl-1H-imidazole <b>7</b>                                                         | A4 |
| 2-(2-{2-[2-(2-Methoxy-ethoxy)-ethoxy]-ethoxy}-ethoxymethyl)-1-methyl-1H-imidazole <b>8</b>                                              | A4 |
| References                                                                                                                              | A5 |

### General Experimental

THF and diethyl ether were freshly distilled over sodium and CH<sub>2</sub>Cl<sub>2</sub> was distilled over CaH<sub>2</sub>. All reagents were used as supplied without purification unless stated. Column chromatography was carried out on Fluorochem Limited Silica Gel 40-63 $\mu$  60A and TLC on aluminium sheets coated with 0.2mm silica gel. Plates were visualised using an UV light and KMnO<sub>4</sub> and PMA with heating. 250MHz <sup>1</sup>H NMR analysis were carried out on a Bruker AC250 sample changer, 300MHz <sup>1</sup>H & <sup>13</sup>C NMR were carried out on a Bruker Advance 300 spectrometer and 500MHz <sup>1</sup>H & <sup>13</sup>C NMR were carried out on a JEOL  $\lambda$ 500MHz spectrometer. Residual signals from the deuterated solvents were used as reference. Coupling constants were measured in Hz. Mass spectra were recorded on a VG Autospec spectrometer.

### (1-Methylimidazol-2-yl) methanol **3**<sup>1</sup>

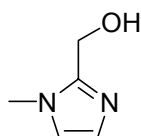

*N*-Methylimidazole (10.0g, 9.6 cm<sup>3</sup>, 0.12 mol) and paraformaldehyde (10.0 g, 0.33 mol) were refluxed at 160 °C for 1 h. The brown solution was dissolved in methanol (12 cm<sup>3</sup>) and cooled to -78 °C and triturated to precipitate a brown solid that was filtered off. The product was recrystallized from CH<sub>2</sub>Cl<sub>2</sub> / petrol (40:60) to give (1-methylimidazol-2-yl) methanol **3** (8.7 g, 0.07 mol, 63%) as a light brown solid. Mpt 115 °C (lit. Error! Bookmark not defined. 114 °C); δ<sub>H</sub> (300MHz, CDCl<sub>3</sub>) 6.81 (1H, d, *J* 1.2, CH=CH), 6.75 (1H, d, *J* 1.2, CH=CH), 5.45 (1H, br s, OH), 4.55 (2H, s, CH<sub>2</sub>OH), 3.66 (3H, s, CH<sub>3</sub>N); δ<sub>C</sub> (75MHz, CDCl<sub>3</sub>) 148.4, 127.0, 121.9, 56.1, 33.2. All NMR data was in accordance with the literature.

### 2-[2-(2-Methoxy-ethoxy)-ethoxymethyl]-1-methyl-1H-imidazole **1**

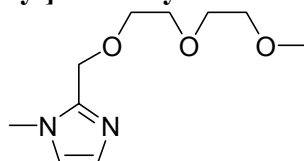

NaH (0.16 g, 4 mmol) was washed with petrol (3 x 5 cm<sup>3</sup>) and dried under vacuum. This was suspended in dry THF (10 cm<sup>3</sup>) and stirred under N<sub>2</sub> for 5 mins. (1-Methyl imidazol-2-yl) methanol **3** (0.11 g, 1.0 mmol) was added and after 30 mins 1-bromo-2-(2-methoxy ethoxy)ethane<sup>2</sup> (0.36 g, 2.0 mmol) was added. The brown mixture was left to stir for 20 h at rt. Methanol (5 cm<sup>3</sup>) was added followed by water (3 cm<sup>3</sup>) to quench excess NaH. The brown solution was extracted with CH<sub>2</sub>Cl<sub>2</sub> (10 x 15 cm<sup>3</sup>). The organic layer dried over MgSO<sub>4</sub> and the solvent removed giving a crude yellow oil. Purification by column chromatography on silica gel with an eluent of CH<sub>2</sub>Cl<sub>2</sub>:MeOH (9.5:0.5) gave a yellow oil **1** (0.134 g, 0.65 mmol, 63%). ν<sub>max</sub> cm<sup>-1</sup> (film) 2878, 1654, 1501, 1453, 1096; δ<sub>H</sub> (500MHz, CDCl<sub>3</sub>) 6.86 (1H, s, CH=CH), 6.80 (1H, s, CH=CH), 4.57 (2H, s, ArCH<sub>2</sub>O), 3.64 (3H, s, NCH<sub>3</sub>), 3.54 (6H, m, CH<sub>2</sub>O), 3.47 (2H, m, CH<sub>2</sub>O), 3.30 (3H, s, OCH<sub>3</sub>); δ<sub>C</sub> (125MHz, CDCl<sub>3</sub>) 144.5, 127.3, 122.0, 71.9, 70.4, 69.0, 65.0, 59.0, 32.8; *m/z* (EI) 215.1389 (1.4%; MH<sup>+</sup>, C<sub>10</sub>H<sub>19</sub>N<sub>2</sub>O<sub>3</sub> requires 215.1396), 199 (16), 183 (2), 169 (4), 139 (3), 125 (7), 111 (96), 95 (100).

### General procedure for the kinetic evaluation of the catalyst for the phosphorylation of cyclohexanol in CH<sub>2</sub>Cl<sub>2</sub>

Et<sub>3</sub>N (4.0 cm<sup>3</sup>, 4.72 mmol from a stock solution in dry CH<sub>2</sub>Cl<sub>2</sub>) and cyclohexanol (4.0 cm<sup>3</sup>, 4.72 mmol from a stock solution in dry CH<sub>2</sub>Cl<sub>2</sub>) were stirred under nitrogen for 15 min with or without catalyst (4.0 cm<sup>3</sup>, 0.472 mmol from a stock solution in dry CH<sub>2</sub>Cl<sub>2</sub>) and with or without MPF<sub>6</sub> (0.472 mmol) as appropriate. Diphenyl chlorophosphate (4.0 cm<sup>3</sup>, 4.72 mmol from a stock solution in dry CH<sub>2</sub>Cl<sub>2</sub>) was added and stirred for 24 h at 30 °C. Samples (1 cm<sup>3</sup>) were removed at timed intervals and quenched with water (10 cm<sup>3</sup>) and extracted with CH<sub>2</sub>Cl<sub>2</sub> (10 cm<sup>3</sup>). The organic layer

was separated, washed with water ( $2 \times 5 \text{ cm}^3$ ) and dried with  $\text{MgSO}_4$ . The solvent was removed and the crude oil was dried under vacuum. The samples were analysed by  $^1\text{H}$  NMR spectroscopy.

#### Data from kinetic plots (Figure 2)

| Time (min) | Product 6 (%) <sup>a</sup>    |                |         |                           |
|------------|-------------------------------|----------------|---------|---------------------------|
|            | No Cat 1<br>Or $\text{KPF}_6$ | $\text{KPF}_6$ | Cat 1   | Cat 1 +<br>$\text{KPF}_6$ |
| 0          | 0                             | 0              | 0       | 0                         |
| 5          | 4 (2)                         | 3 (4)          | 44 (43) | 69 (71)                   |
| 15         | 10 (8)                        | 10 (9)         | 65 (72) | 84 (87)                   |
| 30         | 9 (13)                        | 11 (11)        | 70 (78) | 91 (86)                   |
| 60         | 21 (24)                       | 21 (20)        | 87 (80) | 86 (89)                   |
| 120        | 27 (21)                       | 24 (27)        | 95 (91) | 94 (91)                   |
| 540        | 37 (34)                       | 30 (31)        | 89 (85) | 91 (87)                   |
| 1440       | 46 (49)                       | 46 (50)        | 87 (89) | 92 (91)                   |

<sup>a</sup> Amount of product determined from comparison of the integrals of the  $^1\text{H}$  nmr spectrum. Figures in parenthesis refer to results obtained in a duplicate experiment to validate the data.

#### 2-Heptyloxymethyl-1-methyl-1*H*-imidazole 4

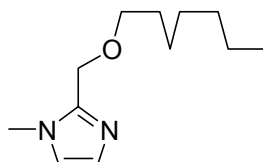

KH (0.11 g, 2.5 mmol) was suspended in dry THF ( $10 \text{ cm}^3$ ) and stirred under  $\text{N}_2$  for 5 mins. (1-Methyl imidazol-2-yl) methanol **3** (0.28 g, 2.5 mmol) was added and after 30 mins 1-heptyl *p*-toluene sulphonate<sup>3</sup> (0.67g, 2.5mmol) was added. The mixture was left to stir for 20 h at rt and ethanol ( $5 \text{ cm}^3$ ) was added followed by water ( $3 \text{ cm}^3$ ) to quench excess KH. The brown solution was extracted with  $\text{CH}_2\text{Cl}_2$  ( $10 \times 15\text{cm}^3$ ). The organic layer was dried over  $\text{MgSO}_4$  and the solvent removed giving a crude yellow oil. Purification by column chromatography on silica gel eluting with  $\text{CH}_2\text{Cl}_2$ :MeOH (9.5:0.5) gave a yellow oil **4** (0.29 g, 1.38 mmol, 55%).  $\nu_{\text{max}} \text{ cm}^{-1}$  (film) 2929, 2857, 1500, 1457, 1095;  $\delta_{\text{H}}$  (250 MHz,  $\text{CDCl}_3$ ) 6.93 (1H, s, CH=CH), 6.86 (1H, s, CH=CH), 4.56 (2H, s, Ar $\text{CH}_2\text{O}$ ), 3.69 (3H, s, N $\text{CH}_3$ ), 3.41 (2H, t,  $J$  6.6, O $\text{CH}_2$ ), 1.61 (2H, m,  $\text{CH}_2$ ), 1.35–1.19 (10H, m,  $\text{CH}_2$ ), 0.78 (3H, t,  $J$  6.6,  $\text{CH}_3\text{CH}_2$ );  $\delta_{\text{C}}$  (63 MHz,  $\text{CDCl}_3$ ) 144.8, 127.2, 121.8, 70.2, 64.7, 32.7, 31.7, 29.5, 29.0, 26.0, 22.5, 14.0;  $m/z$  (EI) 210.1736 (8%;  $\text{M}^+$ ,  $\text{C}_{12}\text{H}_{22}\text{N}_2\text{O}$  requires 210.1732), 112 (21), 111 (34), 96 (100), 95 (58), 81 (13), 57 (6), 54 (23).

### General procedure for the preparation of catalysts 7 and 8

NaH (4 eq.) was washed with petrol ( $3 \times 5 \text{ cm}^3$ ) and dried under vacuum. This was suspended in dry THF ( $10 \text{ cm}^3$ ) and stirred under  $\text{N}_2$  for 5 mins. (1-Methyl imidazol-2-yl) methanol **3** (1 eq) was added and after 30 mins the appropriate polyether bromide (2 eq.) was added. The brown mixture was left to stir for 20 h at rt. After such time the reaction was quenched with methanol ( $5 \text{ cm}^3$ ), followed by water ( $3 \text{ cm}^3$ ). The brown solution was extracted with  $\text{CH}_2\text{Cl}_2$  ( $5 \times 15 \text{ cm}^3$ ), the organic layer dried over  $\text{MgSO}_4$  and the solvent removed giving a crude product. This was purified by column chromatography on silica gel with an eluent of  $\text{CH}_2\text{Cl}_2$ :MeOH (9.5:0.5) to give the desired product.

#### 2-{2-[2-(2-Methoxy-ethoxy)-ethoxy]-ethoxymethyl}-1-methyl-1H-imidazole 7

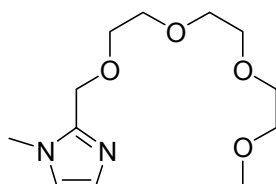

Catalyst **7** was obtained as a yellow oil (68%) using 1-[2-(2-bromo-ethoxy)-ethoxy]-2-methoxy-ethane<sup>4</sup> in accordance with the general procedure.  $\nu_{\text{max}} \text{ cm}^{-1}$  (film) 2876, 1648, 1501, 1454, 1103;  $\delta_{\text{H}}$  (500 MHz,  $\text{CDCl}_3$ ) 6.86 (1H, s, ArCH), 6.80 (1H, s, ArCH), 4.57 (3H, s,  $\text{CH}_3\text{N}$ ), 3.50–3.58 (10H, m,  $5 \times \text{CH}_2\text{O}$ ), 3.46 (2H, m,  $\text{CH}_2$ ), 3.29 (3H, s,  $\text{OCH}_3$ );  $\delta_{\text{C}}$  (126 MHz,  $\text{CDCl}_3$ ) 144.3, 127.0, 121.9, 71.7, 70.3, 70.2, 70.1, 68.9, 64.8, 58.7, 32.6;  $m/z$  (EI) 258.1589 (12%,  $\text{M}^+$   $\text{C}_{12}\text{H}_{22}\text{N}_2\text{O}_4$  requires 258.1579), 258 (12), 183 (7), 155 (9), 139 (13), 111 (100), 95 (84), 81 (7), 59 (42).

#### 2-(2-{2-[2-(2-Methoxy-ethoxy)-ethoxy]-ethoxy}-ethoxymethyl)-1-methyl-1H-imidazole 8

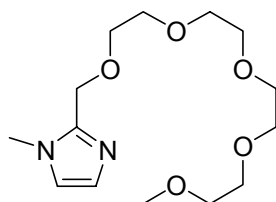

Catalyst **8** was obtained as a yellow oil (71%) using 1-{2-[2-(2-bromo-ethoxy)-ethoxy]-ethoxy}-2-methoxy-ethane<sup>5</sup> in accordance with the general procedure.  $\nu_{\text{max}} \text{ cm}^{-1}$  (film) 2874, 1500, 1453; 1104;  $\delta_{\text{H}}$  (250MHz,  $\text{CDCl}_3$ ) 6.84 (1H, s, ArCH), 6.79 (1H, s, ArCH), 4.54 (2H, s, Ar $\text{CH}_2$ ), 3.62 (3H, s,  $\text{CH}_3\text{N}$ ), 3.52–3.56 (14H, m,  $7 \times \text{CH}_2\text{O}$ ), 3.45 (2H, m,  $\text{CH}_2\text{O}$ ), 3.28 (3H, s,  $\text{CH}_3\text{O}$ );  $\delta_{\text{C}}$  (63MHz,

CDCl<sub>3</sub>) 144.5, 127.3, 122.0, 71.8, 70.5, 70.4, 70.2, 69.0, 64.9, 58.9, 32.8; *m/z* (ES) 303.1911 (100%; MH<sup>+</sup>, C<sub>14</sub>H<sub>27</sub>N<sub>2</sub>O<sub>5</sub> requires 303.1920), 325 (M<sup>+</sup>+Na), 493; *m/z* (EI) 302 (6%), 257 (4), 227 (4), 199 (3), 139 (10), 111 (100), 95 (93), 59 (44).

## References

- <sup>1</sup> (a) M. Pascaly, M. Dua, A. Rompel, B. Sift, W. Meyer-Kalucke and B. Krebs, *Inorg. Chim. Acta* **1999**, *291*, 289-299; (b) M. P. Hay, M. R. Wilson and W. A. Denny, *Tetrahedron* **2000**, *56*, 645-647.
- <sup>2</sup> A. W. Snow and E. E. Foos, *Synthesis* **2003**, 509-512.
- <sup>3</sup> D. H. Burns, J. D. Miller, H-K. Chan and M. O. Delaney, *J. Am. Chem. Soc.*, **1997**, *119*, 2125- 2133.
- <sup>4</sup> T. W. Brockmann and J. M. Tour, *J. Am. Chem. Soc.*, **1995**, *117*, 4437-4447.
- <sup>5</sup> M. Inouye, T. Konishi and K. Isagawa, *J. Am. Chem. Soc.*, **1993**, *115*, 8091-8095.
